# Supplementary material for: Expression of epidermal growth factor, transforming growth factor-β1 and adiponectin in nipple aspirate fluid and plasma of pre and post-menopausal women
Source: PubMed Central journal article supplement (PMC4177617; doi:10.1186/2050-7771-1-18), 2013-04-15
Supplement: 2050-7771-1-18-S1.pdf [file 2050-7771-1-18-S1.pdf]

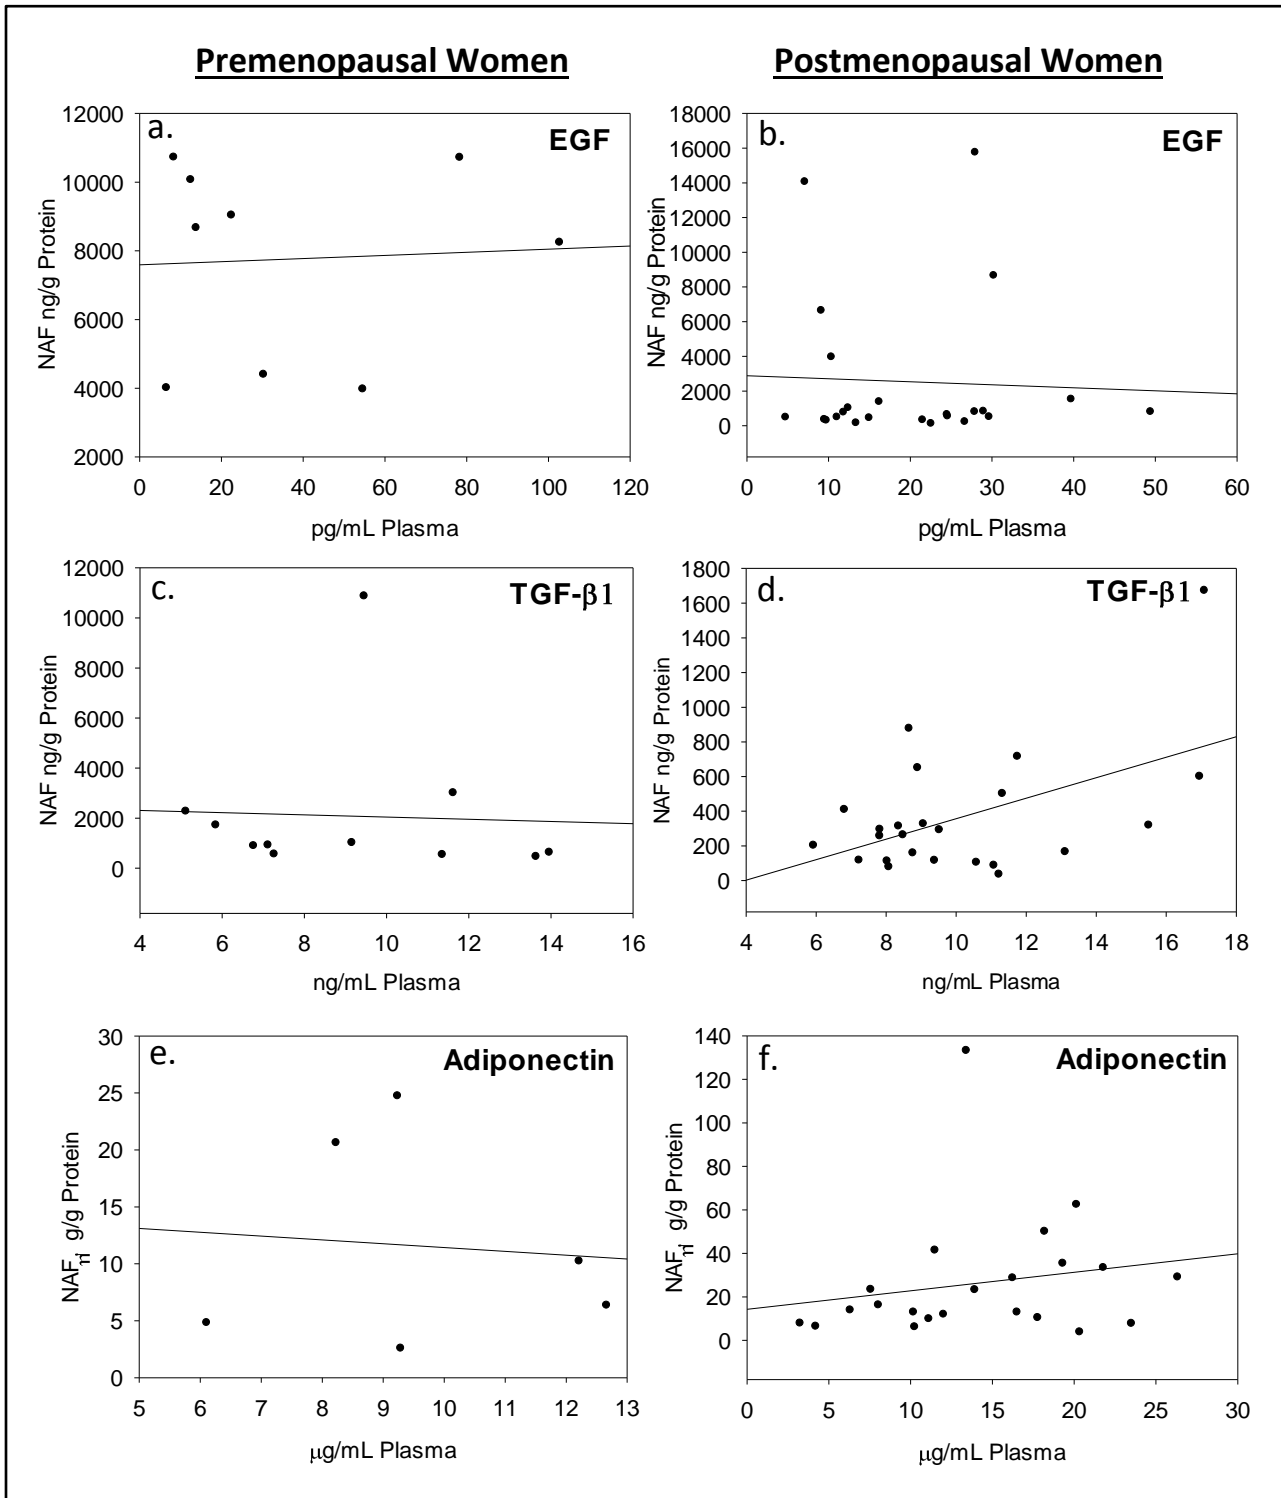

Supplementary Figure 1: Scatter plots illustrating null associations between plasma and NAF levels in premenopausal and postmenopausal women of Epidermal Growth Factor (EGF; a and b), Transforming Growth Factor Beta 1 (TGF-β1; c and d) and Adiponectin (e and f). The appearance of an association between NAF and Plasma levels of TGF-β1 in postmenopausal women (d) seems to be driven by one woman with very high levels in both NAF and plasma.

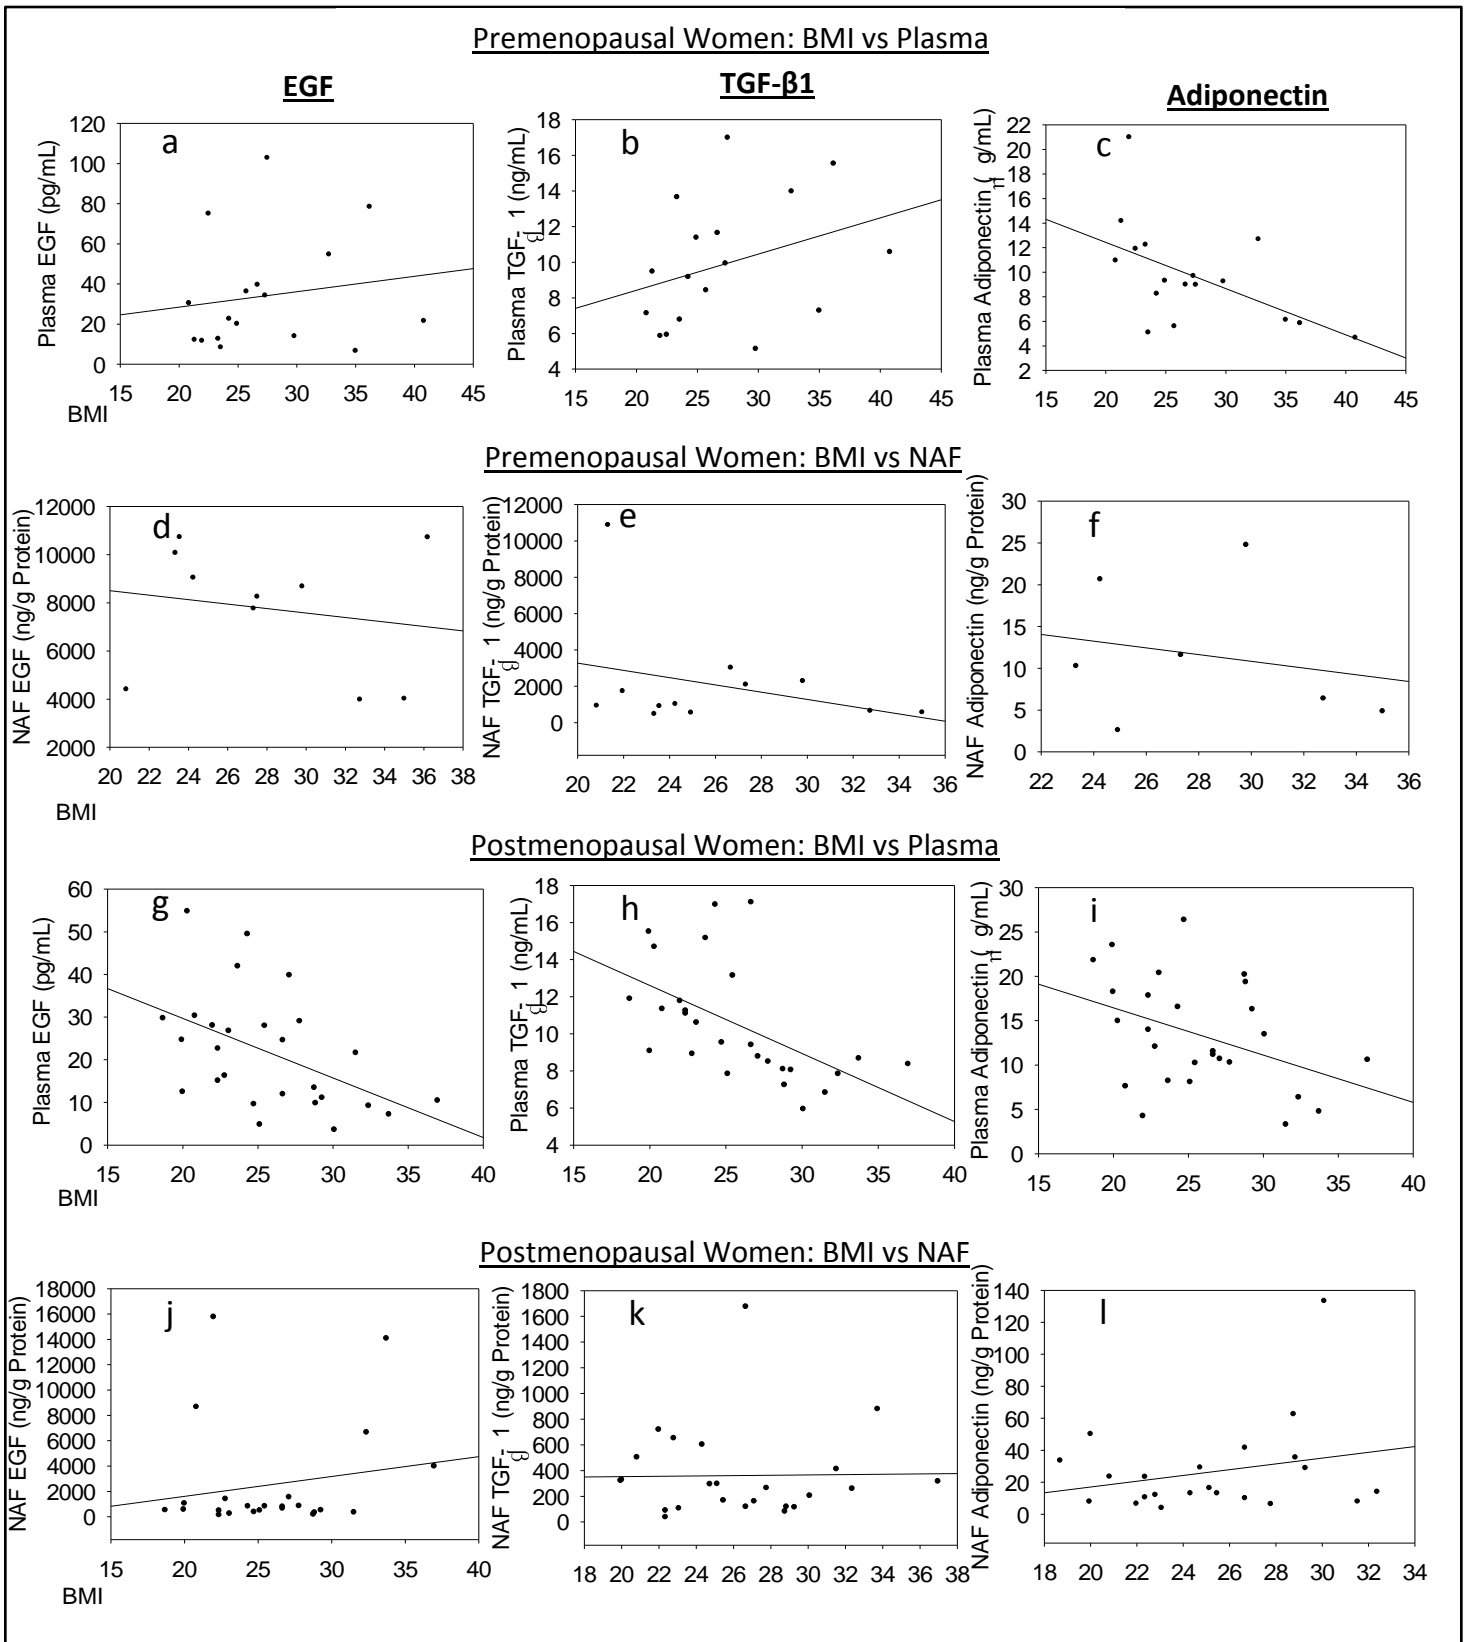

Supplementary Figure 2: Scatter plots illustrating associations between BMI and plasma levels of Epidermal Growth Factor (EGF; a), Transforming Growth Factor Beta 1 (TGF-β1; b) and Adiponectin (c) in premenopausal women; between BMI and NAF levels of EGF (d) TGF- β1 (e) and Adiponectin (f) in premenopausal women; between BMI and plasma levels of EGF (g) TGF- β1 (h) and Adiponectin (i) in postmenopausal women; and between BMI and NAF levels of EGF (j) TGF- β1 (k) and Adiponectin (l) in postmenopausal women.

**Supplementary Table 1: NAF and plasma biomarker levels**

| <b><u>NAF Biomarker Levels</u></b>                | <b><u>EGF (ng/g PT)<sup>a</sup></u></b>                      | <b><u>TGF-β1 (ng/g PT)</u></b> | <b><u>Adiponectin (μg/g PT)</u></b> |
|---------------------------------------------------|--------------------------------------------------------------|--------------------------------|-------------------------------------|
| Premenopausal women                               | 7,759 ± 2,854 <sup>b</sup> (n=9)                             | 2,079 ± 3,027 (n=11)           | 11.6 ± 9.1 (n=6)                    |
| Postmenopausal women                              | 2,532 ± 4,354 (n=24)                                         | 361 ± 357 (n=24)               | 26.3 ± 28.5 (n=22)                  |
| Pre vs postmenopausal women<br>( <i>P</i> -value) | 0.004 <sup>c</sup> (0.02 <sup>d</sup> ) (0.01 <sup>e</sup> ) | 0.01 (0.02) (0.03)             | 0.15                                |
| <b><u>Plasma Biomarker Levels</u></b>             | <b><u>EGF (pg/mL)</u></b>                                    | <b><u>TGF-β (ng/mL)</u></b>    | <b><u>Adiponectin (μg/mL)</u></b>   |
| Premenopausal women (n=16)                        | 34.1 ± 29.0 <sup>c</sup>                                     | 9.92 ± 3.77                    | 9.67 ± 4.19                         |
| Postmenopausal women (n=27)                       | 21.6 ± 13.5                                                  | 10.49 ± 3.13                   | 13.37 ± 6.14                        |
| Pre vs postmenopausal women<br>( <i>P</i> -value) | 0.06 <sup>c</sup> (0.10 <sup>d</sup> ) (0.10 <sup>e</sup> )  | 0.69 (0.68) (0.69)             | 0.07                                |

<sup>a</sup>PT: protein

<sup>b</sup>mean ± SD

<sup>c</sup>*P*-values derived from linear regression models with controlling for BMI

<sup>d</sup>*P*-values derived from linear regression models with controlling for Adiponectin

<sup>e</sup>*P*-values derived from linear regression models with controlling for BMI and Adiponectin
